1 **Machine learning optimization of peptides for presentation by class II**

2 **MHCs**

3

4 Zheng Dai<sup>1,2,†</sup>, Brooke D. Huisman<sup>3,†</sup>, Haoyang Zeng<sup>1,2</sup>, Brandon Carter<sup>1,2</sup>, Siddhartha Jain<sup>1,2</sup>,

5 Michael E. Birnbaum<sup>3\*</sup>, David K. Gifford<sup>1,2,3\*</sup>,

6

7 **1** Computer Science and Artificial Intelligence Laboratory, MIT, Cambridge, MA, USA

8 **2** Dept. of Computer Science and Electrical Engineering, Cambridge, MA, USA

9 **3** Dept. of Biological Engineering, MIT, Cambridge, MA, USA

10

11

12 † These authors contributed equally to this work.

13 \* Correspondence: [mbirnb@mit.edu](mailto:mbirnb@mit.edu), [gifford@mit.edu](mailto:gifford@mit.edu)

14

15

16

## 17 **Abstract**

18 T cells play a critical role in normal immune responses to pathogens and cancer and can be  
19 targeted to MHC-presented antigens via interventions such as peptide vaccines. Here, we  
20 present a machine learning method to optimize the presentation of peptides by class II  
21 MHCs by modifying the peptide's anchor residues. Our method first learns a model of  
22 peptide affinity for a class II MHC using an ensemble of deep residual networks, and then  
23 uses the model to propose anchor residue changes to improve peptide affinity. We use a  
24 high throughput yeast display assay to show that anchor residue optimization successfully  
25 improved peptide binding.

## 26 **Introduction**

27 Peptide vaccines are promising therapeutics for cancer and infectious disease that  
28 stimulate T cells to attack tumor or virally infected cells. T cells surveil peptides displayed  
29 on the cell surface by Major Histocompatibility Complexes (MHCs), or Human Leukocyte  
30 Antigens (HLAs) in humans, and T cell-mediated killing is initiated by recognition of a  
31 foreign peptide bound to an MHC. Specifically, CD8<sup>+</sup> "cytotoxic" T cells recognize peptides  
32 presented by Class I MHCs, and CD4<sup>+</sup> "helper" T cells recognize peptides presented by Class  
33 II MHCs [1]. Peptide vaccines serve to amplify a T cell response to cells displaying disease-  
34 associated peptides, and have proven successful clinically for patients with cancer after  
35 eliciting CD8<sup>+</sup> and CD4<sup>+</sup> T cell responses [2]. To formulate a peptide vaccine, its constituent  
36 peptides are computationally selected from a collection of disease associated peptides, with

37 the criteria for vaccine inclusion including sequence differences from self peptides and the  
38 ability to be displayed by MHCs [2-4].

39 To improve the effectiveness of a peptide vaccine, the display of its component peptides  
40 can be optimized through anchor residue changes. It has been observed that peptide  
41 vaccines containing sequences with modified peptide anchor residues can improve the  
42 tumor cell killing response of the adaptive immune system [5]. For peptides presented by  
43 class I MHCs, not all modifications to the antigen sequences improve the recognition of  
44 tumor-displayed peptides by the immune system [6]. However, in contrast to class I MHCs  
45 which present peptides in an arched conformation within a closed peptide-binding groove,  
46 class II MHCs have open grooves in which presented peptides are displayed in an extended  
47 conformation, which results in peptides binding in a highly conserved manner. The peptide  
48 side chains at positions P1, P4, P6, and P9 are completely buried within binding pockets in  
49 the groove and are considered anchor positions [7]. These four anchor residues are key  
50 determinants of peptide-MHC binding affinity. Changing the identities of the class II MHC-  
51 binding anchor residues will allow us to alter binding affinity without changing binding  
52 conformation or T cell receptor contacts.

53 A rule based approach, EpiOptimizer, has been used to design modified peptides with  
54 anchor position changes that resulted in improved adaptive immune system response [8].  
55 EpiOptimizer uses a limited sequence context for its suggestions, and each MHC Class I  
56 molecule has a different set of rules. By contrast, PeptX [9] uses a genetic algorithm to  
57 determine the peptides mostly likely to be displayed by a specific MHC class I allele, which

58 may provide helpful information for the subsequent design of a vaccine. The performance  
59 of PeptX was not experimentally evaluated.

60 We introduce a model-based approach to optimize peptide-class II MHC binding by  
61 changing the peptide's anchor residues. This approach uses the entire sequence of disease  
62 associated peptides to produce new peptide sequences with optimized MHC anchor  
63 residues. We adapt a yeast display platform for testing our improved peptide sequences for  
64 binding to class II MHC molecules. We optimize peptide-MHC class II affinity by  
65 enumerating all possible changes to the anchor positions of a peptide, then scoring them  
66 against an objective function in silico and choosing the best ones. This is computationally  
67 tractable due to the limited number of anchor positions on a given peptide.

68 For our objective function, we use predictions from the PUFFIN peptide-MHC binding  
69 model [10] trained on peptide binding data from a class II MHC yeast display platform [11].  
70 PUFFIN uses an ensemble of deep residual networks that takes as input the peptide and  
71 MHC amino acid sequences and outputs a predicted affinity distribution of the peptide for  
72 the MHC, achieving state of the art performance on class II MHC binding prediction  
73 tasks [10]. We show that our method generates peptide modifications that improve peptide  
74 binding affinity for two class II MHCs.

## 75 **Results**

### 76 **We evaluate the complete anchor substitution landscape with a machine** 77 **learning model**

78 For a given MHC class II molecule, we train a neural network-based machine learning (ML)  
79 model (PUFFIN) [10] that takes a 9 residue peptide sequence as input, and outputs a  
80 measure of the strength of the peptide-MHC interaction. PUFFIN outputs uncertainty  
81 estimates which allows us to compute Bayesian acquisition functions. We leverage the  
82 relatively small space of  $20^4-1$  possible anchor substitutions to evaluate an objective  
83 function over each substitution based on the output of the model. We then output the 10  
84 substitutions that score the highest as the proposed optimizations. The use of a neural  
85 network-based model along with the complete enumeration of the anchor substitution  
86 space allows our optimizations to take more complex interactions between residues into  
87 account.

### 88 **Data was collected using a high throughput peptide display assay that measures** 89 **enrichment as a surrogate for affinity**

90 We utilize peptide-MHC binding data from a yeast display platform [11] for data collection  
91 (Fig. 1). In this platform, class II MHCs are covalently linked to a query peptide with a  
92 flexible linker which contains a 3C protease cleavage site. When the linker is cleaved,  
93 unbound peptides can be displaced from the MHC in the presence of a high-affinity  
94 competitor peptide. The linker also contains a peptide-proximal epitope tag, which we use

95 to enrich yeast that maintain peptide-MHC binding. Data is collected over multiple iterative  
96 rounds of selection. After each round of selection, deep sequencing is carried out on the  
97 enriched sequences.

98 We utilized data from two class II MHC alleles: HLA-DR401 (HLA-DRA1\*01:01, HLA-  
99 DRB1\*04:01) and HLA-DR402 (HLA-DRA1\*01:01, HLA-DRB1\*04:02). This ensures that our  
100 results are not an allele specific artifact and allows us to study optimization for multiple  
101 alleles.

102 We utilized enrichment data from a library consisting of random 9-mer peptides flanked by  
103 invariant peptide flanking residues (IPFR) which encourages binding in a single register  
104 and simplifies identification of anchor residues [11]. We used this data to train 2 predictors  
105 for each allele. The first predictor models the enrichment as a continuous value and outputs  
106 a Gaussian distribution, while the second predictor models the enrichment as categorical  
107 and outputs a probability distribution over the categories. In both cases, the enrichment  
108 value of a given 9-mer is based on the last round the 9-mer appears in.

### 109 **We optimized the anchor residues of sequences drawn from viral proteomes**

110 We proposed anchor optimizations to 9-mers drawn from the proteomes of the Zika, HIV,  
111 and Dengue viral proteomes, which we refer to as seed sequences. We selected three sets of  
112 sequences on which to evaluate three different optimization tasks:

- 113 1. 82 seed sequences that originally bind mildly to HLA-DR401 were optimized for high  
114 affinity to HLA-DR401.

115 2. 87 seed sequences that originally bind mildly to HLA-DR402 were optimized for high  
116 affinity to HLA-DR402.

117 3. 44 seed sequences that originally bind strongly to HLA-DR402 but mildly to HLA-  
118 DR401 were optimized for high affinity to both MHC alleles.

119 PUFFIN was designed to characterize the uncertainty of its predictions by outputting a  
120 variance. This allows us to use various Bayesian acquisition functions as our objectives. For  
121 this study, we chose to study point estimate (PE) which is just the enrichment, and upper  
122 confidence bound (UCB) which adds the enrichment and the standard deviation of the  
123 prediction. For our third task of optimizing for both alleles, the objectives were computed  
124 for each allele individually and then added to produce the combined objective.

125 Optimizations using PE and UCB were performed with both the Gaussian and categorical  
126 models, giving a total of 40 optimized sequences for each seed. The optimized sequences  
127 and their seed sequences were then flanked with IPFR and added to a new yeast display  
128 library for testing our designs. For each seed, 10 random anchor substitutions were also  
129 generated as a random control and flanked with IPFR. As a further control, we also flanked  
130 all the 9-mers with their wild type peptide flanking residues (WPFR), which were defined  
131 as the 3 residues that flanked the seed 9-mer in the source proteome. Finally, we sampled  
132 some sequences that performed well and some sequences that performed poorly in the  
133 training data and added them as positive and negative controls respectively.

134 We constructed a new yeast display library composed of these optimized peptides and  
135 controls, and we conducted another series of selections to enrich for binders. . To compare  
136 affinities between given peptides, for each peptide we estimated the proportion of that

137 peptide which survives between rounds. This proportion is unnormalized, so we refer to it  
138 as a round survival rate (RSR). We use it as a surrogate for affinity for the remainder of this  
139 section.

## 140 **Optimization improves the round survival rate of peptides for both HLA-DR401** 141 **and HLA-DR402**

142 We first examine the RSR distribution of the following groups of sequences for each allele:  
143 sequences optimized for that allele with PE under the Gaussian model, UCB under the  
144 Gaussian model, PE under the categorical model, UCB under the categorical model,  
145 sequences with random anchor mutations (negative control), seed sequences (negative  
146 control), sequences from the training data which were not present after round 2 (negative  
147 control), and sequences from the training data which were present after round 2 (positive  
148 control). We find that the groups of optimized sequences exhibit higher RSRs for the alleles  
149 they were optimized for than either of the negative controls (Fig. 2). The improvements are  
150 statistically significant, with  $p \leq 1.58e-23$  between any optimized set and negative control  
151 for either allele by the two sided Mann-Whitney U test.

152 In aggregate, the optimized sequences outperform the unoptimized sequences with  
153 comparable results for all of our optimization methods. For simplicity, we will focus the  
154 rest of this section on our point estimate optimization under the Gaussian model. We  
155 include analysis of the other optimization methods, which are similar, in the supplemental  
156 section (Supplemental Figures 1-4).



157 We find that most optimized sequences outperform their unaltered seed sequences (Fig.  
158 3a, c). For HLA-DR401, for 44 out of the 82 seed sequences, all of the proposed  
159 optimizations performed better, while for HLA-DR402 this was the case for 72 out of the 87  
160 seed sequences. In sequences where optimization was less effective, we find that generally  
161 the seed sequence already has a decent round survival rate (Fig. 3b, d).

### 162 **Sequences can be optimized for multiple alleles simultaneously**

163 We find that sequences that were optimized for both alleles were generally able to improve  
164 their RSR for HLA-DR401 while maintaining their RSR for HLA-DR402 (Fig 4). Out of a total  
165 of 44 seed sequences, there were 35 in which all proposed optimizations had a higher RSR  
166 for HLA-DR401. For 23 seed sequences, all proposed sequence optimizations outperformed  
167 the seeds on HLA-DR401 and achieved greater than 80% of the seed sequence RSR for  
168 HLA-DR402. For 13 seed sequences, all proposed optimizations outperformed the seeds on  
169 both HLA-DR401 and HLA-DR402.

170 If we instead consider seeds where the optimization criterion was reached for at least 8 out  
171 of the 10 proposed sequences, these values rise to 42, 35, and 18 respectively. For the  
172 random controls, they are 2, 1, and 1 (Fig. 4).

### 173 **Our optimizations capture complex interactions between residue positions**

174 By analyzing our training data, we find that the identity of residues outside of the primary  
175 anchor residues can have a significant impact on which anchor residues will improve  
176 affinity. As an example (Fig. 5), for HLA-DR401 if a sequence contains a threonine (T) at the  
177 non-anchor position P7, then having an aspartic acid (D) at anchor position P6 tends to

178 increase the RSR. However, if the sequence contains a D at the non-anchor position P7, then  
179 having a D at P6 tends to decrease the RSR instead. Higher order effects can be seen  
180 between other anchor and non-anchor positions as well, so these relationships are not  
181 limited to adjacent positions nor to residues at P7, which can be considered an auxiliary  
182 anchor because of its contacts with the MHC groove [7].

183 The dependency between anchor positions and non-anchor positions can be observed in  
184 the proposals generated by our method. Out of the 820 sequences proposed using PE under  
185 the Gaussian model for HLA-DR401, 20 (2%) have a D at anchor position P6. Six of our seed  
186 sequences have a T at P7; of our proposed optimizations for these seeds, 17/60 (28%) have  
187 a D at P6. Conversely, nine of our seed sequences have a D at P7, and none of their 90  
188 proposed optimizations have a D at P6. This demonstrates the advantages of enumerating  
189 the full anchor residue landscape as it allows the capture of these higher order effects. In  
190 general, the predicted enrichments for each peptide that PUFFIN generates correlates  
191 strongly with the measured RSR (Supplemental Figure 5).

192 Given the presence of the higher order effects between peptide positions, including non-  
193 anchor positions, it seems unlikely that a more naive approach to anchor optimization  
194 could be as successful. In particular, it is unlikely that there exists a set of anchor residues  
195 that would optimize affinity in all non-anchor contexts. As further support for this, we find  
196 that there are no sets of anchor residues that were proposed for all seed sequences for any  
197 optimization task, even when combining the proposed optimizations across all 4 of our  
198 optimization methods. For HLA-DR401 optimization, the most frequently proposed set is Y,  
199 D, T, A at anchor positions P1, P4, P6, P9 (respectively), which was proposed for 54 out of

200 the 82 seeds. For HLA-DR402, the most frequently proposed set is L, W, T, A at P1, P4, P6,  
201 P9 (respectively), which was proposed for 44 out of the 87 seeds. For optimization for both  
202 alleles, the most frequently proposed set is F, M, N, A at P1, P4, P6, P9 (respectively), which  
203 was proposed 34 out of 44 times.

## 204 **Optimized sequences outperform seed sequences in the absence of the** 205 **invariant flanking residues, but is less effective**

206 All the optimized peptides we have presented so far have been flanked with IPFR, which  
207 were used to train the model. If we replace the IPFR with WPFR, we observe that the  
208 optimized sequences still outperform the seed and random controls (Supplemental Figure  
209 6). The improvement is still significant, with  $p \leq 5.51e-5$  when comparing the optimized  
210 sequences to the random control or seed sequences for either allele under the two sided  
211 Mann-Whitney U test. However, the optimized sequences with WPFR significantly  
212 underperform their IPFR counterparts ( $p \leq 1.36e-22$  for either alleles under the two sided  
213 U test).

214 In the case of the seed and random control groups, the WPFR sequences either do not  
215 display any significant difference or mildly outperform the IPFR counterparts ( $0.0018 \leq p \leq$   
216  $0.92$  under the two-sided Mann-Whitney U test). The drop in RSR is only observed in the  
217 optimized sequences.

## 218 **Optimized sequence motifs are consistent with MHC binding preferences**

219 The peptide optimizations made by our machine learning models are consistent with the  
220 structures and peptide-binding motifs of HLA-DR401 and HLA-DR402 in our training data.

221 The polymorphisms between HLA-DR401 and HLA-DR402 affect the P1 and P4 binding  
222 pockets. Both alleles prefer hydrophobic amino acids in the P1 pocket, although HLA-  
223 DR401 prefers larger amino acids, while the truncated HLA-DR402 pocket prefers smaller  
224 amino acids. In the P4 pocket, HLA-DR401 prefers acidic residues, and HLA-DR402 prefers  
225 basic residues and large hydrophobic residues. The conserved P6 and P9 binding pockets  
226 prefer polar and small amino acids, respectively. The preference for each allele is reflected  
227 in MHC allele-specific peptide optimization, shown for the optimization with PE objective  
228 under the Gaussian model as an example (Fig. 6a). Joint MHC optimization is also  
229 consistent with these preferences: P1 and P4 amino acids are mutually preferred between  
230 both alleles, such as F/I/L at P1 and increased usage of M at P4. P6 and P9 amino acids are  
231 consistent with usage in individual allele-optimized peptides. Amino acid frequency in the  
232 seed sequences are also shown for reference (Fig. 6b).

## 233 **Discussion**

234 In this work, we introduced our method for optimizing the affinity of peptide sequences for  
235 class II MHCs by replacing their anchor residues with more optimal residues generated  
236 with the help of a machine learning model. We validated this technique on two different  
237 class II alleles, and showed that it is possible to optimize a single sequence for multiple  
238 alleles simultaneously. We have developed a high throughput yeast display-based pipeline  
239 to test our optimized sequences, and we introduced the notion of a round survival rate  
240 which allows us to compare the results of the assay.

241 We demonstrated that our method leverages a deep learning model in a way that allows  
242 our optimizations to capture complex interactions between residues. Our ability to  
243 optimize sequences for two alleles simultaneously suggests that the method can generalize  
244 to even more complicated objectives. These contributions improve our ability to engineer  
245 peptides for therapeutic purposes, and allows us to develop more robust cocktails by  
246 allowing their constituent peptides to fulfill multiple objectives.

247 As a caveat, we note that our optimization is less effective if we allow arbitrary flanking  
248 residues. The drop in RSR when we change from IPFR to WPFR is only observed in the  
249 optimized sequences and is not observed in seed or sequences with random anchor  
250 residues. Therefore, it is likely that the drop in performance is due to the predictor being  
251 trained on IPFR data, so the predictor is unable to take the effects of flanking residues or  
252 register shifts into account. The IPFRs also contain preferred amino acids in the flanking  
253 sequences, such as the tryptophan at position P10. Aromatic residues at P10 have been  
254 shown to bolster binding and may impact the superior performance of IPFR peptides  
255 compared to WPRF peptides [11, 12]. We note that since our method is independent of the  
256 specific underlying predictor, we should be able to address this issue by replacing our  
257 current predictor with one that takes the flanking residues into account. As a general  
258 statement, the quality of our optimization should improve as the quality of predictors  
259 available continues to improve.

260 Our future work will attempt to address the issues pertaining to the sophistication of the  
261 predictor, and will seek to characterize the effect of anchor optimization on peptide  
262 immunogenicity.

## 263 **Methods**

### 264 **Collecting enrichment data using a high throughput peptide display assay**

265 We utilize peptide-MHC binding data from a yeast display library of  $\sim 10^8$  random 9mer  
266 peptides (Fig. 1)[11]. The peptides are flanked by invariant peptide flanking residues  
267 (IPFR), which encourages binding in a single register and simplifies identification of anchor  
268 residues. The IPFR consists of “AA” on the N-terminus and “WEEG” on the C-terminus.  
269 Paired-end sequencing reads [11] were assembled via FLASH [13] and filtered for correct  
270 length and 3C cut site sequence.

271 In order to test our optimized sequences, we adapted the yeast display platform and  
272 workflow from randomized peptide libraries to presentation of user-defined peptides. We  
273 designed a 36,000-member defined library containing our optimized sequences, which was  
274 synthesized by Twist Bioscience as a single-stranded oligo pool with a maximum length of  
275 120 nucleotides. The oligo pool was amplified with low cycle number PCR then amplified  
276 with construct DNA using overlap extension PCR. This longer DNA product was assembled  
277 with the linearized pYal vector in yeast at a 5:1 mass ratio of insert:vector and  
278 electroporated into electrocompetent RJY100 yeast. To better assess enrichment, the HLA-  
279 DR401 and HLA-DR402 defined peptide libraries were doped into a  $\sim 20$ -million-member  
280 randomized peptide library containing stop codons at a ratio of approximately 1:500 so  
281 that each unique peptide was represented at similar starting frequency. The diverse null  
282 library had the peptide encoded as  
283 “NNNTAANNNNNNNNNTAGNNNNNNNNNNNTGANNNNNN”, where N indicates any

284 nucleotide. Doping into this library provides a null set of peptides over which real binders  
285 must enrich.

286 For each round of selection, yeast were washed into PBS, with competitor peptide (HLA-  
287 DR401: HA<sub>306-318</sub>, 1uM; HLA-DR402: CD48<sub>36-53</sub>, 5uM) and 1uM 3C protease, then incubated  
288 for 45min room temperature. After incubation, yeast were washed into cold acid saline  
289 (20mM pH5 citric acid, 150mM NaCl) with competitor peptide (same concentration as first  
290 incubation) and 1uM HLA-DM, then incubated overnight at 4°C. Negative selections for  
291 non-specific binders was performed with anti-AlexaFluor647 magnetic beads (Milltenyi  
292 Biotech; Bergish Gladbach, Germany), followed by a positive selection consisting of  
293 incubation with anti-Myc-AlexaFluor647 antibody (1:100 volume:volume) and positive  
294 selection with anti-AlexaFluor647 magnetic beads. The first round was conducted on 400  
295 million yeast for 20x coverage of peptides and incubations were conducted in 2mL PBS  
296 and 4mL acid saline. For subsequent rounds, 25 million yeast were selected; incubations  
297 were conducted in 250uL PBS, 500uL acid saline. Four iterative rounds of selection were  
298 performed and repeated in duplicate. Between rounds, yeast were grown to confluence at  
299 30°C in SDCAA (pH=5) yeast media and subcultured into SGCAA (pH=5) media at OD<sub>600</sub>=1  
300 for two days at 20°C [14].

301 Following selections, plasmid DNA was isolated from 10 million yeast from each round  
302 using a Zymoprep Yeast Miniprep Kit (Zymo Research; Irvine, CA). Amplicons were  
303 generated to capture the peptide through the 3C protease site. Unique barcodes were  
304 added for each library and round of selection and i5 and i7 anchors added through two

305 rounds of PCR. Amplicons were sequenced on an Illumina MiSeq (Illumina; San Diego,  
306 California) at the MIT BioMicroCenter, with a paired-end MiSeq v2 300nt kit.  
307 Forward and reverse reads are assembled using PandaSeq. Data were processed using in-  
308 house scripts to extract peptide sequences with correctly encoded constant flanking  
309 regions. Peptides were filtered for exact matches to the defined sequences ordered from  
310 Twist and those matching the DNA encoding of the randomized null library.  
311 HLA-DM was recombinantly expressed as previously described [11]. In brief, the  
312 ectodomains of the alpha and beta chains were followed by a poly-histidine purification  
313 site and encoded in pAcGP67a vectors. Plasmids for each chain were separately transfected  
314 into SF9 insect cells with BestBac 2.0 baculovirus DNA (Expression Systems; Davis, CA) and  
315 Cellfectin II reagent (Thermo Fisher; Waltham, MA). Cells were propagated to high virus  
316 titer, co-titrated to ensure an equal ratio of alpha and beta expression, and co-transduced  
317 into Hi5 cells. Following 48-72 hours of incubation, proteins were purified with Ni-NTA  
318 resin and purified with size exclusion chromatography on an AKTAPURE FPLC S200  
319 increase column (GE Healthcare; Chicago, IL).

## 320 **Training a neural network based ML model to predict the enrichment category** 321 **of a peptide**

322 We trained a neural network-based machine learning (ML) model (PUFFIN) [10] to predict  
323 the enrichment label of a new peptide. The predictor takes a 9 residue peptide sequence as  
324 input, and outputs an enrichment label. We use the final round where a peptide is observed  
325 in the peptide display assay as our enrichment label for both training and prediction. For



326 example, if a sequence appears in the sequencing reads for round 3 but fails to appear in  
327 round 4 or any other future rounds, it receives the label “3”. To improve the granularity,  
328 round 5 presence was further split up into 3 categories, where “5” indicates round 5  
329 presence with less than 10 read counts in round 5, “6” indicates round 5 presence with a  
330 read count between 10-99 inclusive, and “7” indicates round 5 presence with a read count  
331 of 100 or more. A label of 0 is given to sequences that only appear before any enrichment is  
332 performed. This gives a total of 8 enrichment categories.

333 PUFFIN is an ensemble of deep residual neural networks that is regularized by dropout and  
334 controlled for overfitting with validation data. Each component model consists of one  
335 convolutional layer, five residual blocks, and one output layer. Each residual fits the  
336 difference between the input and the output of a residual block with two convolutional  
337 layers. Each convolutional layer has 256 convolutional filters and is followed by a batch-  
338 norm layer. ReLU is used as non-linearity throughout the network.

339 For each allele, we trained two predictors to predict the enrichment labels. The first  
340 predictor assumes the enrichment labels 0-7 are realizations of a continuous random  
341 variable taken from a Gaussian distribution, and was trained to output a mean and  
342 variance. The second predictor models the labels as categoricals, and outputs a discrete  
343 probability distribution over the 8 labels 0-7. For regularization, dropout [15] is used in the  
344 output layer with a dropout probability of 0.2. We randomly hold out 10% of the data for  
345 validation, and the rest is used for training. We use Adam [16] to minimize the negative log-  
346 likelihood of the observed enrichment under the probability distribution parameterized by

347 the output of the neural network. We train for 50 epochs and select the model from the  
348 epoch where validation loss is minimized.

349 While the outputs of each predictor naturally characterize aleatoric uncertainty, we also  
350 characterize the epistemic uncertainty through ensemble methods [17]. Specifically, we  
351 generate 10 training and validation splits of our data and train 2 separate predictors for  
352 each split, giving us an ensemble of 20 predictors. When performing predictions, we run  
353 each predictor 50 times with dropout turned on [18], resulting in a total of 1000  
354 predictions for each input. The final output is then characterized by a mean and variance,  
355 where the mean is the average of the distribution means over all 1000 trials, and the final  
356 variance is the average of the distribution variances for each trial plus the variance of the  
357 distribution means.

### 358 **Using an ML model to compute an objective function for anchor optimization**

359 For both the Gaussian and the categorical predictors, we considered two different objective  
360 functions for scoring 9-mers: point estimate (PE) and upper confidence bound (UCB). In  
361 both functions, we first run our predictor over the 9-mer to obtain a predicted mean and  
362 variance. Then to compute the PE objective, we simply return the mean. To compute UCB,  
363 we return the sum of the mean and the standard deviation, which we take to be the square  
364 root of the variance.

365 This gives us a total of 4 methods for scoring 9-mers. For each method, given an input 9-  
366 mer to optimize we enumerate all possible residue substitutions at positions 1, 4, 6, and 9  
367 (sequences are 1-indexed). For each substitution, we compute its score using our objective

368 function, and in the end we output the 10 sequences that score the highest as proposed  
369 optimizations.

### 370 **Designing a validation library to test the efficacy of anchor optimization**

371 We evaluate our optimization methods on three tasks:

- 372 1. Optimizing peptide sequences that originally bind mildly to HLA-DR401 for higher  
373 affinity to HLA-DR401;
- 374 2. Optimizing peptide sequences that originally bind mildly to HLA-DR402 for higher  
375 affinity to HLA-DR402;
- 376 3. Optimizing peptide sequences that originally bind strongly to HLA-DR402 but mildly  
377 to HLA-DR401 for high affinity to both MHC alleles.

378 Our evaluation was conducted using viral peptides selected from the Zika, HIV, and Dengue  
379 viral proteomes. The 9-mers in the candidate proteomes have no overlap with the peptides  
380 in our random peptide training library. We selected seeds for optimization from Zika, HIV,  
381 and Dengue based on the predictions of the categorical predictor. We first filter the  
382 sequences by removing all whose PUFFIN prediction has a predicted variance higher than  
383 the median predicted variance. For the seeds for Task 1 and Task 2, we selected peptides  
384 with a predicted enrichment mean between 2 and 3, yielding 82 seeds for HLA-DR401 and  
385 87 seeds for HLA-DR402. For the seeds for Task 3, we selected peptides with a predicted  
386 HLA-DR401 enrichment mean below 3 and a predicted HLA-DR402 enrichment mean  
387 above 5, resulting in 44 seeds.

388 For each seed sequence, we ran each of our 4 optimization methods over it for each allele,  
389 giving 10 optimized sequences for each method. As a control, we also proposed 10 random  
390 anchor residue mutations for each seed.

391 We then take the seed, optimized, and random sequences and flank them with IPFR. As a  
392 control, we also produce a second set of sequences from the same 9-mers but flanked with  
393 WPFR, defined to be the 3 residues that flank the original seed sequence in the original  
394 proteome. This forms the basis of the library.

395 As a further control, we added sequences from the original training data to the library. For  
396 each allele, we sampled 300 sequences that had no presence after the second round of  
397 selections, and 300 sequences that had presence after the second round of selections,  
398 giving us 1200 sequences overall.

### 399 **Calculating round survival rate as a representation of enrichment**

400 The enrichment information reported in the peptide display assay comes in the form of a  
401 vector of read counts indexed by round. In order to compare enrichment between different  
402 peptides, we assign to each peptide a value that can be interpreted as an unnormalized  
403 proportion of that peptide that survives between rounds of enrichment. We will refer to  
404 this quantity as a round survival rate (RSR), where a higher RSR will be indicative of higher  
405 enrichment.

406 To calculate a peptide's RSR, we consider a simplified model where the peptide has a  
407 starting concentration drawn from a given prior, and the dominating event is peptide  
408 dissociation from the class II MHC. Additionally, we assume that we can treat the entire

409 experiment as though it was happening in one solution, and everything that occurs  
410 between rounds can be captured by a scaling factor. Finally, we suppose that read counts  
411 follow a Poisson distribution parameterized by the concentration multiplied by a scaling  
412 factor.

$$413 \quad R_{S,i} \sim \text{Poisson}(\alpha_i c_S p_S^i)$$

$$414 \quad \ln(c_S) \sim \text{Gaussian}(0,1)$$

415 For all peptides  $S$  and all rounds  $i$ , where  $R_{S,i}$  is the read count of peptide  $S$  in round  $i$ ,  $c_S$  is  
416 the starting concentration of the peptide  $S$ ,  $p_S$  is an unnormalized proportion of peptide  $S$   
417 that survive to the next round, and  $\alpha_i$  is a round specific constant. The prior for  
418 constraining  $c_S$  is for regularization purposes, and a log normal distribution was selected  
419 for its interpretability as the outcome of a Wiener process.

420 We then define the RSR for peptide  $S$  as the maximum a posteriori (MAP) estimate of  $p_S$ .  
421 This value is not unique, as an adequate scaling in the  $\alpha_i$  values can give the same  
422 probabilities with different  $p_S$  values. However, such a transformation preserves the ratio  
423 between  $p_S$ , and in practice we find that the estimates converge reliably (Supplemental  
424 Figure 7). We estimate these values by iteratively optimizing each variable individually for  
425 500 rounds. 23 rounds were carried out with random initializations, where  $p_S$  were drawn  
426 from  $\text{Uniform}(0.1,1)$  and  $\ln(c_S)$  were drawn from  $\text{Gaussian}(0,1)$ . We compute how well the  
427 model estimates the true read counts (Supplemental Figure 8).

428 For experiments conducted over the defined library, we use the null library to construct a  
429 baseline model where the read count in each round follows its own Poisson distribution.

430 The lambda parameter for each distribution was estimated by average read counts (with  
431 added pseudocounts for peptides which don't show up in any round added to make the  
432 variance of the distribution in the zeroth round match the mean). When performing MAP  
433 estimation, an additional parameter is given to each peptide which indicates whether it  
434 comes from this baseline distribution or from the model described above to filter out noise.  
435 RSR values of replicate selections of the defined library are concordant with the first  
436 replicate (Pearson and Spearman correlation coefficients 0.81-0.84; Supplemental Figure  
437 9), suggesting selections and RSR determination is reproducible. A subset of sequences is  
438 absent from a single replicate due to stochastic dropout, which likely occurs in the initial  
439 rounds of selection when each member of the library is present at low frequency.

## 440 **Acknowledgments**

441 This work was supported in part by a Schmidt Futures grant to D.K.G. and M.E.B., a  
442 Melanoma Research Alliance Grant to M.E.B., and the National Institutes of Health  
443 (R01CA218094 to D.K.G. and P30CA14051 to M.E.B.).  
444 Siddhartha Jain's contribution was made prior to him joining Amazon.

## 445 **Author contributions**

446 Z.D. provided the analysis of the peptide display data under the supervision of D.K.G., while  
447 B.D.H. performed the assays under the supervision of M.E.B. H.Z., B.C., S.J., and B.D.H.

448 performed many initial explorations of the problem and provided preliminary analysis.

449 Z.D., B.D.H., and D.K.G. wrote the manuscript with input from the coauthors.

## 450 **Competing interests**

451 Michael E. Birnbaum is an advisor to Repertoire Immune Medicine. David K. Gifford is a founder

452 of ThinkTx.

## 453 **References**

454 1. Hennecke, J. & Wiley, D. C. T cell receptor–mhc interactions up close. *Cell* **104**, 1–4

455 (2001).

456 2. Ott, P. A. et al. An immunogenic personal neoantigen vaccine for patients with

457 melanoma. *Nature* **547**, 217 (2017).

458 3. Abelin, J. G. et al. Mass spectrometry profiling of hla-associated peptidomes in mono-

459 allelic cells enables more accurate epitope prediction. *Immunity* **46**, 315–326

460 (2017).

461 4. Hu, Z., Ott, P. A. & Wu, C. J. Towards personalized, tumour-specific, therapeutic

462 vaccines for cancer. *Nature Reviews Immunology* **18**, 168 (2018).

463 5. van Stipdonk, M. J. et al. Design of agonistic altered peptides for the robust induction

464 of ctl directed towards h-2db in complex with the melanoma-associated epitope

465 gp100. *Cancer Research* **69**, 7784–7792 (2009).

- 466 6. Cole, D. K. et al. Modification of mhc anchor residues generates heteroclitic peptides  
467 that alter tcr binding and t cell recognition. *The Journal of Immunology* **185**, 2600–  
468 2610 (2010).
- 469 7. Jones, E. Y., Fugger, L., Strominger, J. L. & Siebold, C. Mhc class ii proteins and  
470 disease: a structural perspective. *Nature Reviews Immunology* **6**, 271–282 (2006).
- 471 8. Houghton, C. S. et al. Immunological validation of the epitoptimizer program for  
472 streamlined design of heteroclitic epitopes. *Vaccine* **25**, 5330–5342 (2007).
- 473 9. Knapp, B., Giczi, V., Ribarics, R. & Schreiner, W. Peptx: Using genetic algorithms to  
474 optimize peptides for mhc binding. *BMC Bioinformatics* **12**, 241 (2011).
- 475 10. Zeng, H. & Gifford, D. K. Quantification of uncertainty in peptide-mhc binding  
476 prediction improves high-affinity peptide selection for therapeutic design. *Cell*  
477 *Systems* **9**, 159-166 (2019).
- 478 11. Rappazzo, C. G., Huisman, B. D. & Birnbaum, M. E. An unbiased determination of  
479 class ii mhc peptide repertoires via large yeast-displayed libraries. Accepted at  
480 *Nature Communications* (2020).
- 481 12. Zavala-Ruiz, Z., Strug, I., Anderson, M. W., Gorski, J. & Stern, L. J. A polymorphic  
482 pocket at the p10 position contributes to peptide binding specificity in class ii mhc  
483 proteins. *Chemistry & biology* **11**, 1395–1402 (2004).
- 484 13. Magoč, T. & Salzberg, S. L. FLASH: fast length adjustment of short reads to improve  
485 genome assemblies. *Bioinformatics*. **27**, 2957-2963 (2011).



- 486 14. Chao, G. et al. Isolating and engineering human antibodies using yeast surface  
487 display. *Nature Protocols* **1**, 755–768 (2006).
- 488 15. Srivastava, N., Hinton, G., Krizhevsky, A., Sutskever, I. & Salakhutdinov, R. Dropout: a  
489 simple way to prevent neural networks from overfitting. *The Journal of Machine*  
490 *Learning Research* **15**, 1929–1958 (2014).
- 491 16. Kingma, D. P. & Ba, J. Adam: A method for stochastic optimization. In *International*  
492 *Conference on Learning Representations* (2015).
- 493 17. Lakshminarayanan, B., Pritzel, A. & Blundell, C. Simple and scalable predictive  
494 uncertainty estimation using deep ensembles. In *Advances in Neural Information*  
495 *Processing Systems*, 6402–6413 (2017).
- 496 18. Gal, Y. & Ghahramani, Z. Dropout as a bayesian approximation: Representing model  
497 uncertainty in deep learning. In *International Conference on Machine Learning*,  
498 1050–1059 (2016).

## 499 **Figure legends**

500 **Figure 1. Characterization of peptide class II MHC binding by yeast display.** On the top  
501 is a schematic of the construct used in the assay. The diagram on the bottom shows the  
502 overall process. First, the peptide-MHC is expressed on the surface of yeast, and then the  
503 linker between peptide and the MHC molecule is cleaved. Peptide exchange is catalyzed,  
504 and yeast are selected which retain the Myc epitope tag. The resulting population is then  
505 sequenced and carried on to the next round.

506

507 **Figure 2. Anchor optimization improves round survival rate.** The distributions of RSR  
508 for **a)** HLA-DR401 and **b)** HLA-DR402 is plotted for the optimized and control groups. The  
509 sequences from the training data are split into two groups: “Training data (LRP 0-2)” is  
510 composed of sequences which did not appear after round 2 in the initial display assay and  
511 is shown as a negative control, while “Training data (LRP 3-5)” is composed of sequences  
512 that did appear after round 2 and is shown as a positive control. The differences between  
513 the optimized groups and the negative controls (Random control, Seed and Training data  
514 (LRP 0-2)) are significant for both alleles, with  $p \leq 1.58e-23$  under the two sided Mann-  
515 Whitney U test. Each plot is a combination of a box plot and a violin plot, where the  
516 distribution is shown by the violin plot in a lighter color, and the box plot shows the middle  
517 quartiles in a darker color along with the median. The mean is indicated by a black vertical  
518 line. Flier points are marked with the “|” symbol.

519

520 **Figure 3. Number of sequences that exhibit improvement after optimizing with the**  
521 **point estimate objective under the Gaussian model. a)** For each seed sequence, we  
522 calculate for each seed sequence the number of proposed optimizations that achieve a RSR  
523 for HLA-DR401 that is higher than that of the seed. We then take that as a percentage of the  
524 number of proposals to obtain the optimization success rate. We plot the distribution of  
525 these rates for both sequences optimized for HLA-DR401 affinity and the randomly  
526 perturbed sequences. **b)** For each sequence optimized for HLA-DR401 affinity and  
527 randomly perturbed sequence, we plot their RSR for HLA-DR401 against the RSR of the  
528 seed sequence they derive from. **c)** We calculate the distribution of optimization success  
529 rates for sequences optimized for HLA-DR402 using RSR for HLA-DR402. **d)** We plot the  
530 RSR for HLA-DR402 of sequences optimized for HLA-DR402 against the RSR of their seed  
531 sequence.

532

533 **Figure 4. Number of sequences that exhibit improvement for multiple alleles after**  
534 **optimizing with the point estimate objective under the Gaussian model. a)** For each  
535 seed sequence, we calculate for each seed sequence the number of proposed optimizations  
536 that achieve a RSR for HLA-DR401 that is higher than that of the seed. We then take that as  
537 a percentage of the number of proposals to obtain the optimization success rate. We plot  
538 the distribution of these rates for both sequences optimized for HLA-DR401 and HLA-  
539 DR402 affinity and the randomly perturbed sequences. **b)** We produce the same  
540 distribution but with optimization success rates based on HLA-DR402 affinity. The seed  
541 sequences were selected to have high HLA-DR402 affinity. **c)** For each optimized, random

542 control, and seed sequence, we plot their RSR for both alleles. **d)** For each optimized and  
543 random control sequence, we take their RSR and subtract the RSR of the seed sequence  
544 they derive from to obtain the changes in their RSR.

545

546 **Figure 5. Whether a given anchor residue improves affinity can depend on non-**  
547 **anchor residues.** Peptides with aspartic acid at P7 tend to have lower round survival rates  
548 when compared to all peptides, and peptides that additionally have another aspartic acid at  
549 anchor position P6 tend to have even lower round survival rates than the peptides that just  
550 have an aspartic acid at P7. In contrast, although peptides with threonine at non-anchor  
551 position P7 also tend to have lower round survival rates when compared to all peptides,  
552 peptides that additionally have an aspartic acid at anchor position P6 tend to have higher  
553 round survival rates instead even when compared to all peptides. The differences found in  
554 these comparisons are significant, with  $p \leq 4.968e-5$  between any two groups mentioned  
555 above under the Mann-Whitney two sided U test. The sequences plotted and used for  
556 computing significance are from the training data. Each plot is a combination of a box plot  
557 and a violin plot, where the distribution is shown by the violin plot in a lighter color, and  
558 the box plot shows the middle quartiles in a darker color along with the median. The mean  
559 is indicated by a black vertical line. Flier points are marked with the “|” symbol.

560

561 **Figure 6. Motifs arising from optimization with the PE objective under the Gaussian**  
562 **model. a)** Sequence logos depicting the motifs present in the optimized sequences. For  
563 each position, 3 different residue distributions are shown. The first one shows the

564 distribution for the sequences optimized for HLA-DR401, the last one shows the  
565 distribution for the sequences optimized for HLA-DR402, and the one in the middle shows  
566 the distribution for the sequences optimized for both alleles. **b)** Sequence logos depicting  
567 the motifs present in the original seed sequences for comparison with the same setup.

**Figure 1**

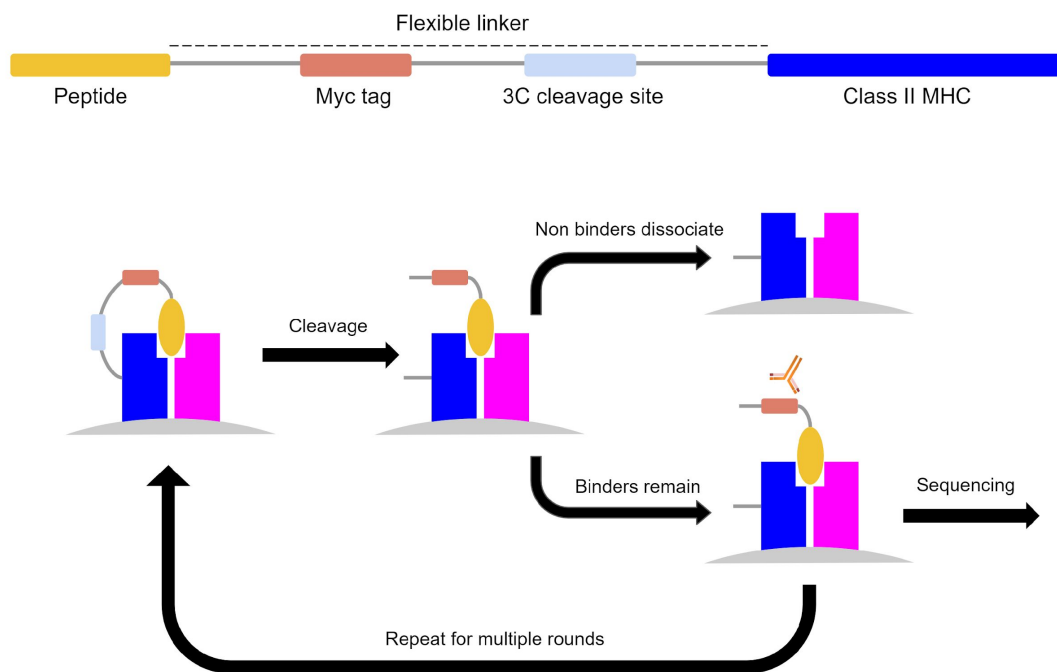

**Characterization of peptide class II MHC binding by yeast display.** On the top is a schematic of the construct used in the assay. The diagram on the bottom shows the overall process. First, the peptide-MHC is expressed on the surface of yeast, and then the linker between peptide and the MHC molecule is cleaved. Peptide exchange is catalyzed, and yeast are selected which retain the Myc epitope tag. The resulting population is then sequenced and carried on to the next round.

## Figure 2

a)

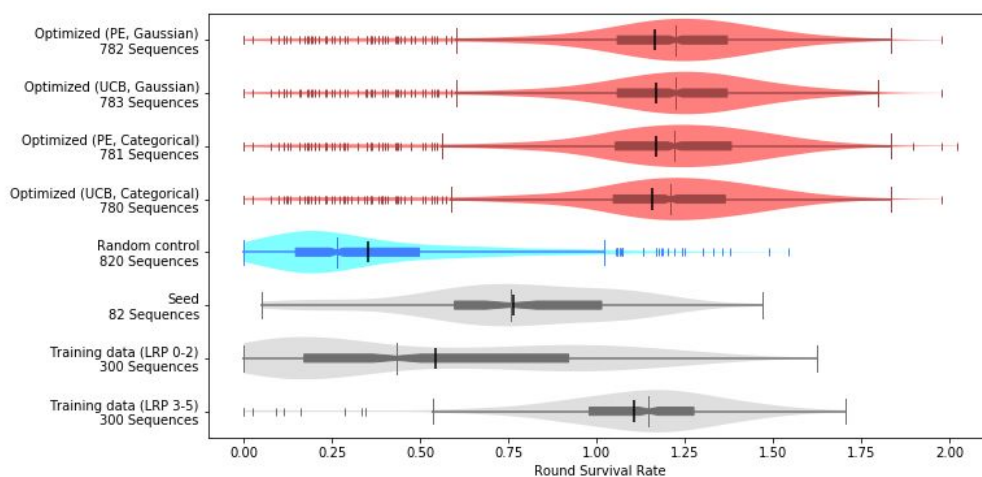

b)

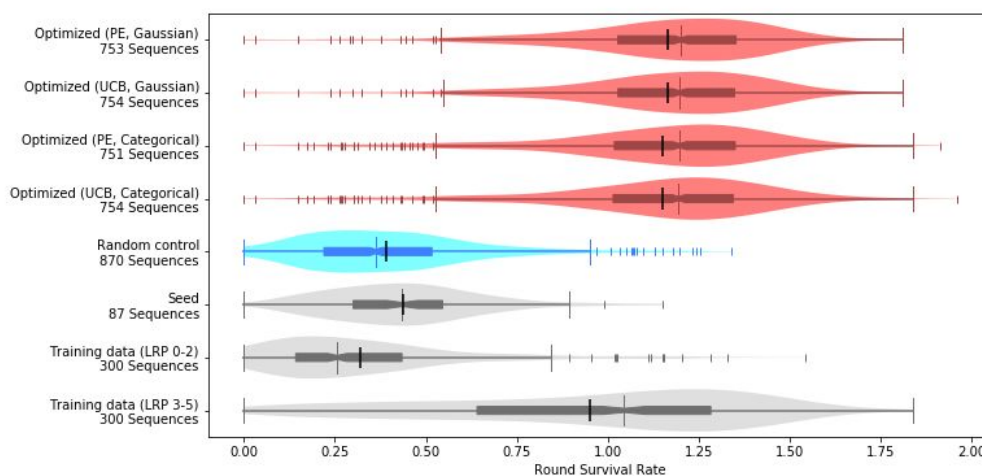

**Anchor optimization improves round survival rate.** The distributions of RSR for **a)** HLA-DR401 and **b)** HLA-DR402 is plotted for the optimized and control groups. The sequences from the training data are split into two groups: "Training data (LRP 0-2)" is composed of sequences which did not appear after round 2 in the initial display assay and is shown as a negative control, while "Training data (LRP 3-5)" is composed of sequences that did appear after round 2 and is shown as a positive control. The differences between the optimized groups and the negative controls (Random control, Seed and Training data (LRP 0-2)) are significant for both alleles, with  $p \leq 1.58e-23$  under the two sided Mann-Whitney U test. Each plot is a combination of a box plot and a violin plot, where the distribution is shown by the violin plot in a lighter color, and the box plot shows the middle quartiles in a darker color along with the median. The mean is indicated by a black vertical line. Flier points are marked with the "|" symbol.

### Figure 3

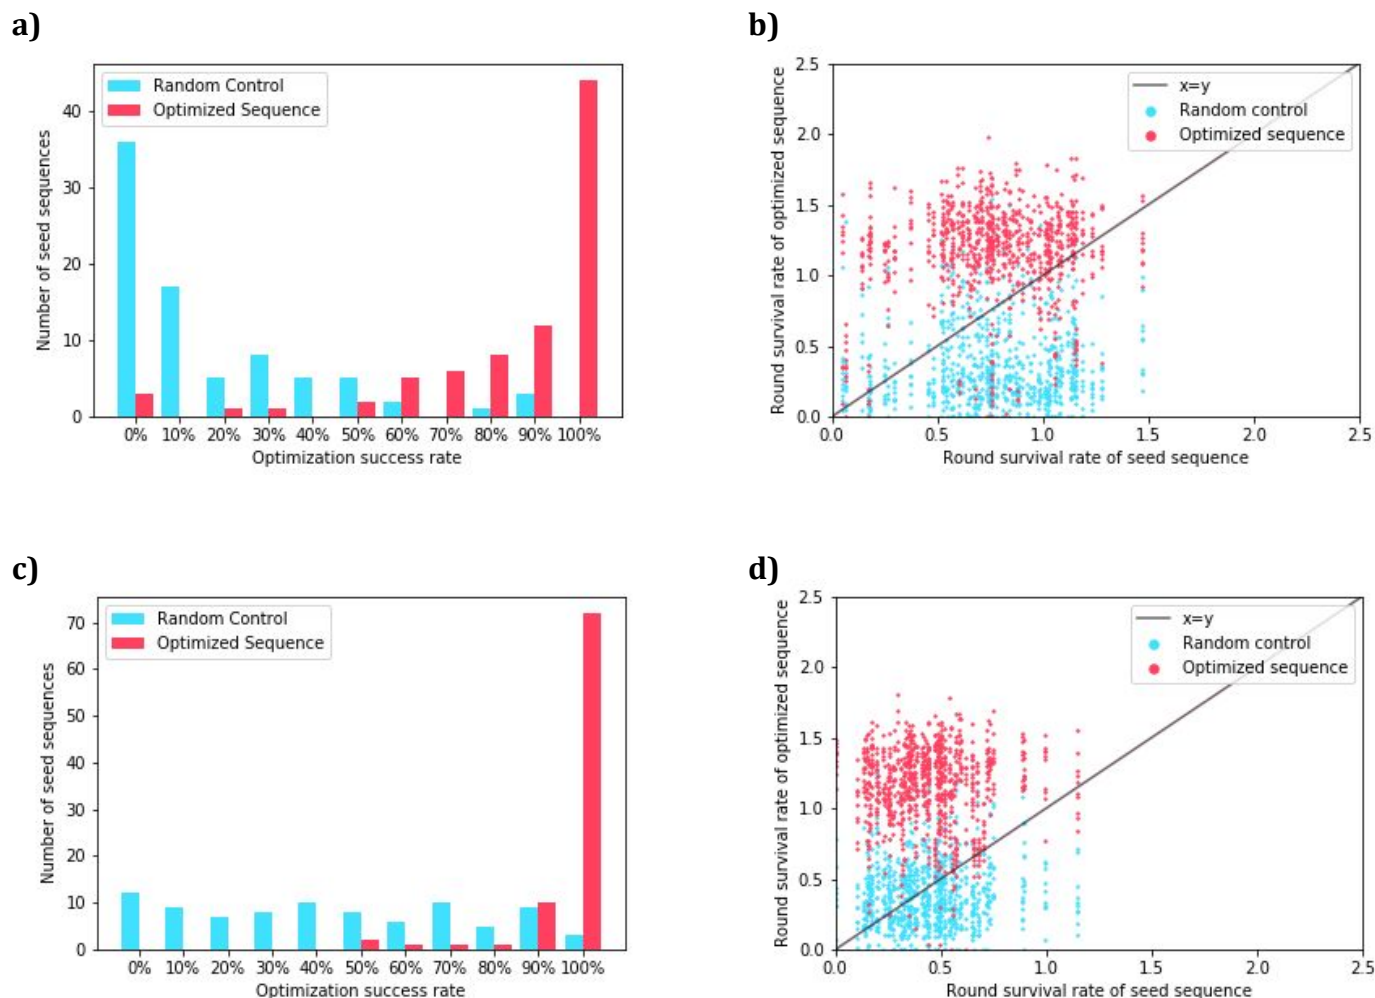

**Number of sequences that exhibit improvement after optimizing with the point estimate objective under the Gaussian model. a)** For each seed sequence, we calculate for each seed sequence the number of proposed optimizations that achieve a RSR for HLA-DR401 that is higher than that of the seed. We then take that as a percentage of the number of proposals to obtain the optimization success rate. We plot the distribution of these rates for both sequences optimized for HLA-DR401 affinity and the randomly perturbed sequences. **b)** For each sequence optimized for HLA-DR401 affinity and randomly perturbed sequence, we plot their RSR for HLA-DR401 against the RSR of the seed sequence they derive from. **c)** We calculate the distribution of optimization success rates for sequences optimized for HLA-DR402 using RSR for HLA-DR402. **d)** We plot the RSR for HLA-DR402 of sequences optimized for HLA-DR402 against the RSR of their seed sequence.



**Figure 4**

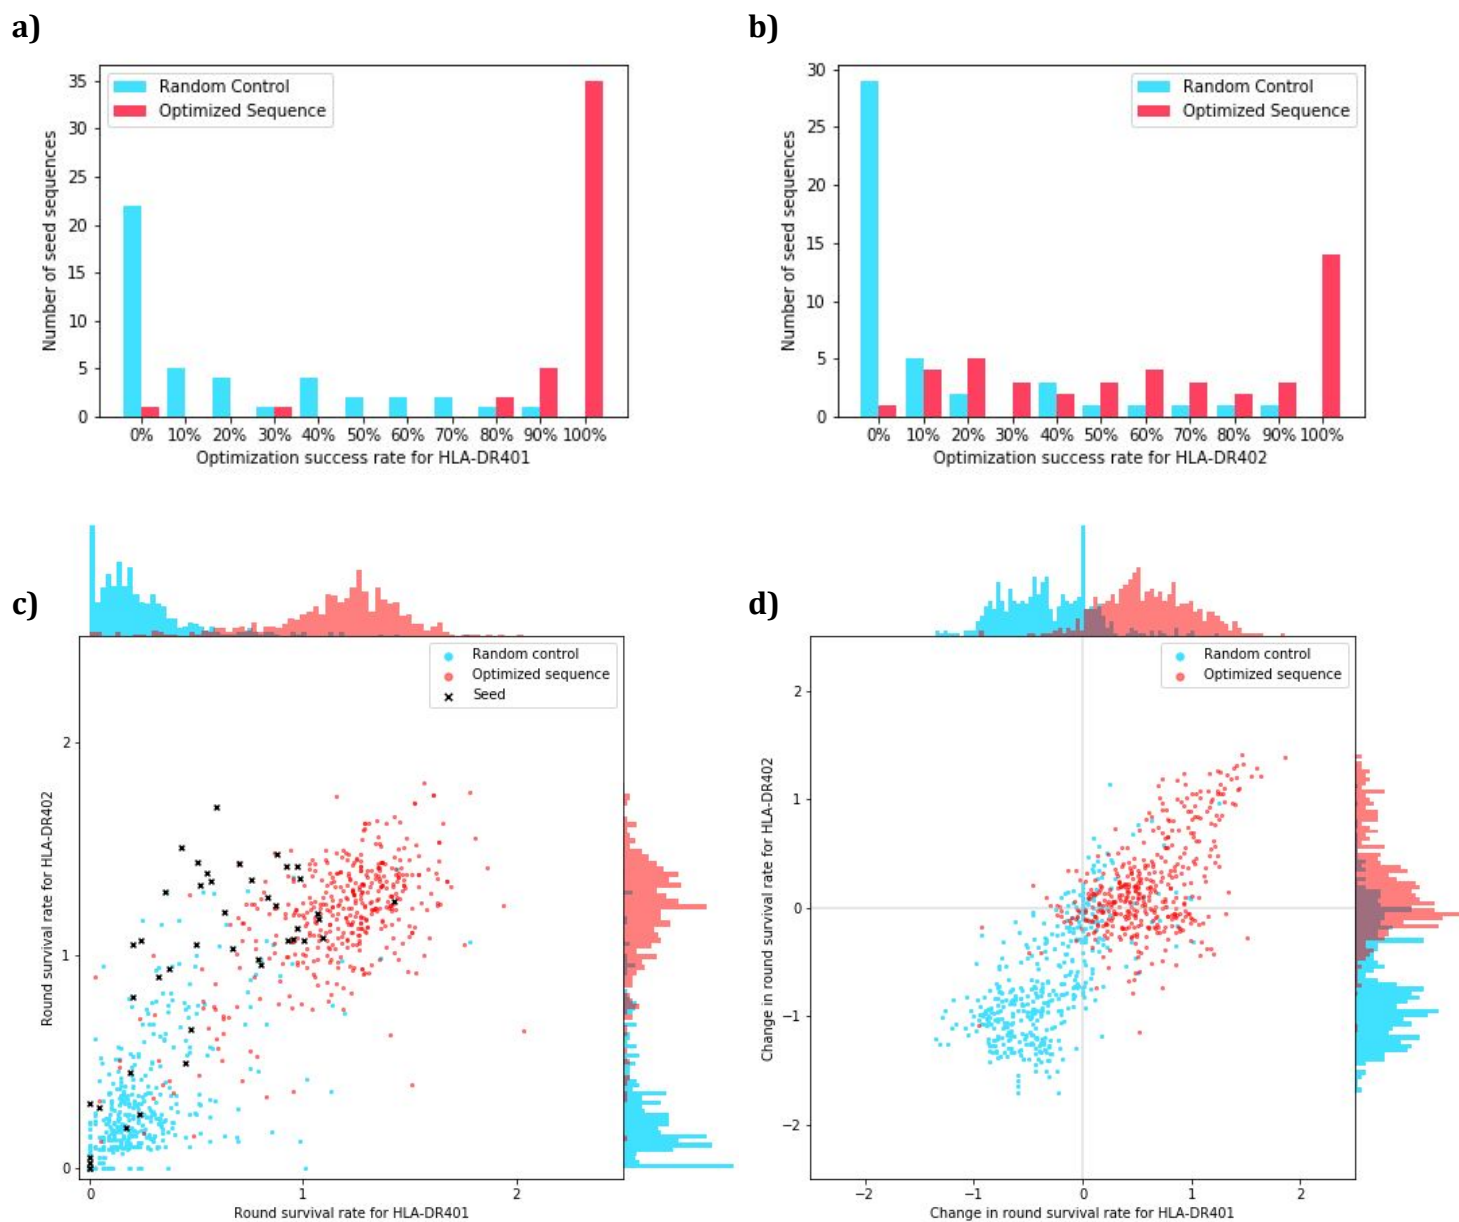

**Number of sequences that exhibit improvement for multiple alleles after optimizing with the point estimate objective under the Gaussian model. a)** For each seed sequence, we calculate for each seed sequence the number of proposed optimizations that achieve a RSR for HLA-DR401 that is higher than that of the seed. We then take that as a percentage of the number of proposals to obtain the optimization success rate. We plot the distribution of these rates for both sequences optimized for HLA-DR401 and HLA-DR402 affinity and the randomly perturbed sequences. **b)** We produce the same distribution but with optimization success rates based on HLA-DR402 affinity. The seed sequences were selected to have high HLA-DR402 affinity. **c)** For each optimized, random control, and seed sequence, we plot their RSR for both alleles. **d)** For each optimized and random control sequence, we take their RSR and subtract the RSR of the seed sequence they derive from to obtain the changes in their RSR.

**Figure 5**

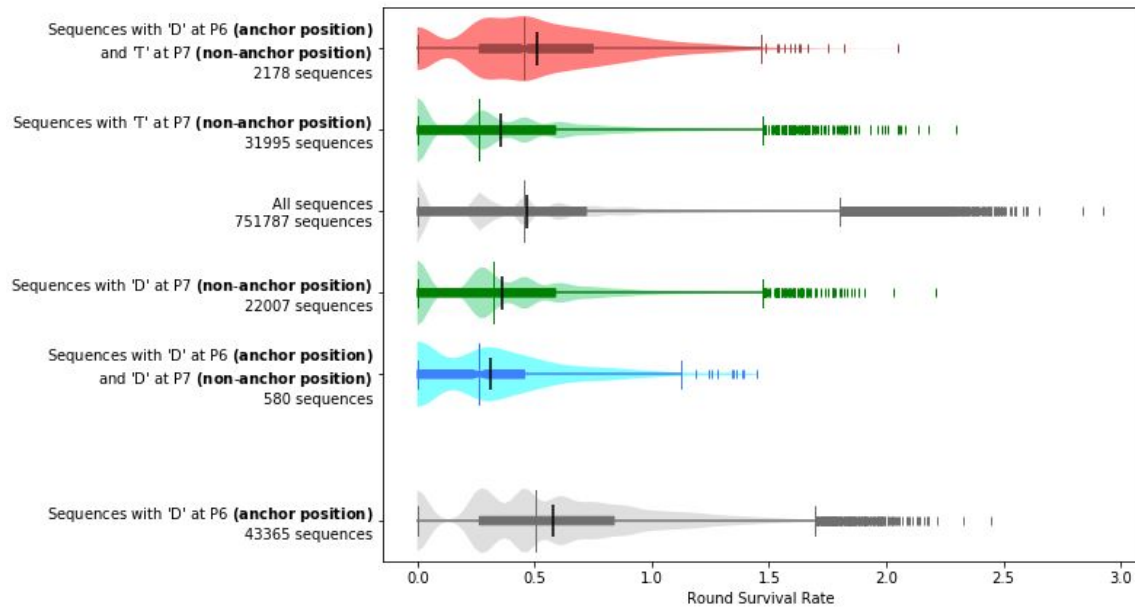

**Whether a given anchor residue improves affinity can depend on non-anchor residues.**

Peptides with aspartic acid at P7 tend to have lower round survival rates when compared to all peptides, and peptides that additionally have another aspartic acid at anchor position P6 tend to have even lower round survival rates than the peptides that just have an aspartic acid at P7. In contrast, although peptides with threonine at non-anchor position P7 also tend to have lower round survival rates when compared to all peptides, peptides that additionally have an aspartic acid at anchor position P6 tend to have higher round survival rates instead even when compared to all peptides. The differences found in these comparisons are significant, with  $p \leq 4.968e-5$  between any two groups mentioned above under the Mann-Whitney two sided U test. The sequences plotted and used for computing significance are from the training data. Each plot is a combination of a box plot and a violin plot, where the distribution is shown by the violin plot in a lighter color, and the box plot shows the middle quartiles in a darker color along with the median. The mean is indicated by a black vertical line. Flier points are marked with the “|” symbol.

**Figure 6**

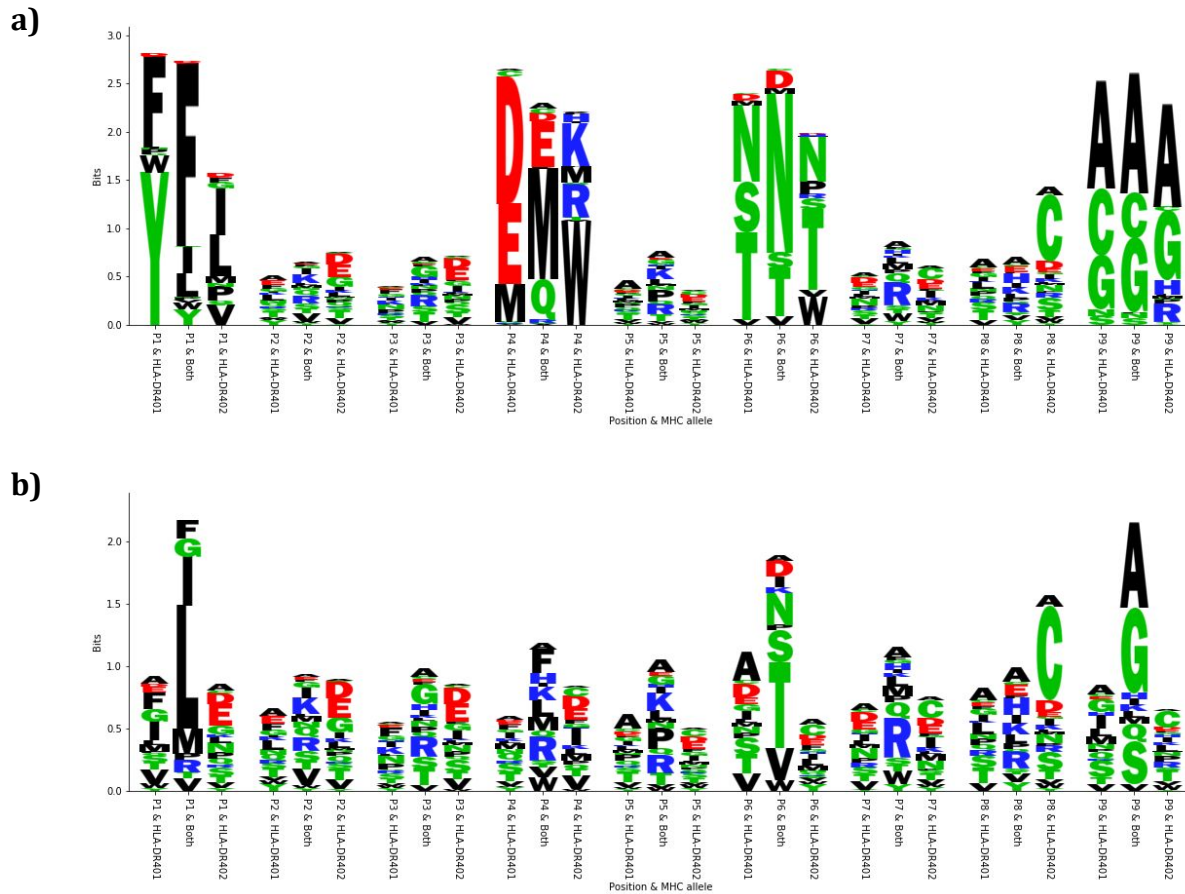

**Motifs arising from optimization with the PE objective under the Gaussian model.**

**a)** Sequence logos depicting the motifs present in the optimized sequences. For each position, 3 different residue distributions are shown. The first one shows the distribution for the sequences optimized for HLA-DR401, the last one shows the distribution for the sequences optimized for HLA-DR402, and the one in the middle shows the distribution for the sequences optimized for both alleles. **b)** Sequence logos depicting the motifs present in the original seed sequences for comparison with the same setup.
